# Supplementary material for: SOX9 Governs Differentiation Stage-Specific Gene Expression in Growth Plate Chondrocytes via Direct Concomitant Transactivation and Repression
Source: PubMed Central journal article supplement (PMC3207907; doi:10.1371/journal.pgen.1002356), 2011-11-03
Supplement: pgen.1002356.s003.pdf [file pgen.1002356.s003.pdf]

>chr10:34105562-34105595 (col10a1) [34bp]

|            |                                     |        |
|------------|-------------------------------------|--------|
|            | GLI                                 | SOX9   |
|            | >>>>>>                              | >>>>>> |
| Mouse      | ACACCCAGAATAAAAAATAGTTTAATACACACAAT |        |
| Human      | .....G.....T.A.T.....               |        |
| Chimpanzee | .....G.....T.A.T.....               |        |
| Cow        | ..T..T.....T.A.T.....               |        |
| Dog        | ..T..C.....T.A.T.....               |        |
| Opossum    | .A.T.....T.A.T.....                 |        |

>chr2:134007701-134007756 (Bmp2) [56bp]

|            |                                                         |        |
|------------|---------------------------------------------------------|--------|
|            | GLI                                                     | SOX9   |
|            | <<<<<<                                                  | >>>>>> |
| Mouse      | TGGGTGTTCTGTCACTGTCCACCTAAAATCCAGGGCAGGCTGGAAGTTGCACAAT |        |
| Human      | .....T.T.G.C..T.T.A.CC.....T.CT.....                    |        |
| Chimpanzee | .....T.T.G.C..T.T.A.CC.....T.CT.....                    |        |
| Cow        | .....G.C..TG..CC..ATTCT.....T.....                      |        |
| Dog        | .....G.C..A..C..C.TA.....                               |        |

>chr2:134195987-134196052 (Bmp2) [66bp]

|            |                                                                   |        |
|------------|-------------------------------------------------------------------|--------|
|            | SOX9                                                              | GLI    |
|            | <<<<<<                                                            | >>>>>> |
| Mouse      | ATTGTGCCCTTCTCGGAGTGATATCATCATTACACAT--CTCACTGATAAAAAATAGATGGGTGG |        |
| Human      | .....AA..T.....AAA.....T.....T.T.A.CC.....T.....                  |        |
| Chimpanzee | .....AA..T.....AAA.....T.....T.T.A.CC.....T.....                  |        |
| Cow        | ..A..T.....GAAA.....T.....C.T.T.AAC.....T.....T.GCCTT.....        |        |
| Dog        | .C.....A..T.....AAA.....G.....CG..T.ACC.....T.GC.....             |        |

>chr1:94025250-94025321 (Hdac4) [72bp]

|            |                                                                           |        |
|------------|---------------------------------------------------------------------------|--------|
|            | SOX9                                                                      | GLI    |
|            | >>>>>>                                                                    | >>>>>> |
| Mouse      | CACAATAAATAAGACACACAATGAGCCCAAGAGACCACATGCAAGTTGGAAA--AGATCAGAATAACACCCA  |        |
| Human      | .....a.....G..TG..A.A..A.TTA.T.A..T.....T---.CAGA..C.....                 |        |
| Chimpanzee | .....a.....G..TG..A.A..A.TTA.T.CA..T..T.GAC..CAGA..C.....                 |        |
| Dog        | g....c..ca..G.A--G..TTG.....A....AGTTGGGC.ATCT....T..AC...CT.C.G.G.T..... |        |

>chr13:83216167-83216275 (Mef2c) [109bp]

|            |                                                                                                             |        |
|------------|-------------------------------------------------------------------------------------------------------------|--------|
|            | GLI                                                                                                         | SOX9   |
|            | >>>>>>                                                                                                      | >>>>>> |
| Mouse      | CCACCCATTAGCCTCAACTACACACTGATGCTATACTTACACCTACTCGTTATGTATTACTTTTTATATAACTAAGCAGCACCCCTGTCAATAATGAAATATTCAAT |        |
| Human      | .....T.....G.....                                                                                           |        |
| Chimpanzee | .....T.....G.....                                                                                           |        |
| Cow        | .....T.....G.....                                                                                           |        |
| Dog        | .....T.....G.....                                                                                           |        |
| Opossum    | ..A.....T..GT..--C..T..C.....A.....                                                                         |        |

>chr13:83443669-83443711 (Mef2c) [43bp]

|            |                                           |         |
|------------|-------------------------------------------|---------|
|            | SOX9                                      | GLI     |
|            | >>>>>>                                    | <<<<<<< |
| Mouse      | ATTCAATTTGACCATGACCAATAAATTTATGAACTGGGTGT |         |
| Human      | .....CA.....                              |         |
| Chimpanzee | .....CA.....                              |         |
| Cow        | .....CA.....                              |         |
| Dog        | .....CA.....                              |         |
| Opossum    | .....CA.....                              |         |

>chr13:83600703-83600742 (Mef2c) [40bp]

|            |                                       |        |
|------------|---------------------------------------|--------|
|            | GLI                                   | SOX9   |
|            | >>>>>>                                | >>>>>> |
| Mouse      | CCACCCATACCTAGGACTGGTCCACAGCCAGACCAAT |        |
| Human      | .....GC.....                          |        |
| Chimpanzee | .....GC.....                          |        |
| Cow        | .....G.....GC.....                    |        |
| Dog        | .....GC.....                          |        |
| Opossum    | .....GCA.....TG.....                  |        |

>chr13:83667713-83667825 (Mef2c) [113bp]

|            |                                                                                                                         |        |
|------------|-------------------------------------------------------------------------------------------------------------------------|--------|
|            | SOX9                                                                                                                    | GLI    |
|            | <<<<<<                                                                                                                  | >>>>>> |
| Mouse      | ATGAATGTTACTTAAACATCATTTTTATGAA--AATATAATACGTGGAGCTTTGTT---AGAGAATAGTTTGTTTTACCT-GTAGCATTTTTAAACTCAAACCTT-CTAAACACCCA   |        |
| Human      | .....TA.....G..C.TAC..CAG.....G..GTT.T.....G..A..TCAG..AT.A.....G.....A.AA..A.....G.....TCTT.....C.T..C.....            |        |
| Chimpanzee | .....G.....C.TAC..CAG.....G..GTT.T.....G..A..TCAG..AT.A.....G.....A.AA..A.....G.....TCTT.....C.T..C.....                |        |
| Cow        | .....A..TTAC..GG..C..C.TAC..CAA..GGG..GTT.TC..G..A..TCAG..A-A.....G.....A.AA..A.....G.....C.CT.....T..TG..T..           |        |
| Dog        | .....G.TG..C.G..T..C..TAC..CAA..---.GTTAT...G..A..TCAT...ATCA...G.....TA.AA..A..C..G.....C.T.....C-T..C..T..            |        |
| Opossum    | .CA.G...GGAAG..TT...CAC..TAC..TAG..C...AGTTCT.GC.G..G..CA---.AT.A.A..A..G.....A.AA..A.....G.....TA..C.....CTT..GCT.T... |        |

>chr13:83667819-83667904 (Mef2c) [86bp]

|            |                                                                                    |        |
|------------|------------------------------------------------------------------------------------|--------|
|            | GLI                                                                                | SOX9   |
|            | >>>>>>                                                                             | >>>>>> |
| Mouse      | ACACCCAAACCCACAGTAATTTCTGCTCTTTTAAAAATGAAGTCTTTTTTACCCTACTGATGCCTCTAGTGTCTCCACAAAT |        |
| Human      | .....TTT.....T.....C.....A.....T.....A.....T.....A.....                            |        |
| Chimpanzee | .....TTT.....T.....C.....A.....T.....A.....T.....A.....                            |        |
| Cow        | G..T.....T.T.....A.....T.....A.....T.....A.....                                    |        |
| Dog        | ..T..T..T.T.....A.....T.....A.....T.....A.....C..T..A.....                         |        |
| Opossum    | CT.T...GTT.T.TGA.C.....A.....C.....C.....A.....T.....A.....                        |        |

>chr13:83804422-83804502 (Mef2c) [81bp]

|            |                                                                              |        |
|------------|------------------------------------------------------------------------------|--------|
|            | GLI                                                                          | SOX9   |
|            | <<<<<<                                                                       | >>>>>> |
| Mouse      | TGGGTGGCAGAAGCAAAAGACCTTATTAACGAGGCTATATTTTCTTAACTGATGCAATCCAGAATAGACCACAAAT |        |
| Human      | .....G.....T.....A.....C.....                                                |        |
| Chimpanzee | .....G.....T.....A.....C.....                                                |        |
| Cow        | .....A.....G.....C.....TG.....                                               |        |
| Dog        | .....G.....C.....C.....G.....C.....TC.....                                   |        |
| Opossum    | .....G..TT...C.C..TG.A..C.....C.....T.....A...TTCC.....TT.T....              |        |

>chr17:44641295-44641391 (Runx2) [97bp]

|            |                                                                                                     |        |
|------------|-----------------------------------------------------------------------------------------------------|--------|
|            | GLI                                                                                                 | SOX9   |
|            | <<<<<<                                                                                              | >>>>>> |
| Mouse      | ACACCCATAGGTACAGAGACTCCATGTGGCTAAATGGAATAGCTTTTGGTGGGAA-AT--ACAAGTGGTTGTACAACCTGTATATTCTTTGCCATGAAT |        |
| Human      | .....TT.G.AG.....ATA.....T..AT.....T.....AT.....C--TT.T.G.AGG.A.....A.....G.....                    |        |
| Chimpanzee | .....TT.G.AG.....ATA.....T..AT.....T.....AT.....C--TT.T.G.AGG.A.....A.....T..C.....G.....           |        |
| Cow        | .....T.....TT.G.AG.....A---.A..T..AT...GT...AT...ATTTGGGGG.AG..C.....G.....C.....G.....CCC          |        |
| Dog        | GTC...TT.G.GG...A.A--.A..GC..AT...C...AT...CTTT-T.T.G.AGG.CC...AC..G..A.....C.C..TG....             |        |

>chr13:29027527-29027604 (Sox4) [78bp]

|            |                                                                                    |        |
|------------|------------------------------------------------------------------------------------|--------|
|            | SOX9                                                                               | GLI    |
|            | <<<<<<                                                                             | >>>>>> |
| Mouse      | ATTGTGACCGTCAAAATAGGCCCTCTGTGGGGTGT-AT--TCTGCCTTGGATGCAGCACTTCTGACAGGCTCTTCTGGGTGT |        |
| Human      | .....A..C.....A.....C..C--.....CA.....T.....T.....T.A..AT.....                     |        |
| Chimpanzee | .....A..C.....A.....C..C--.....CA.....T.....T.....T.A..AT.....                     |        |
| Cow        | ..CAA.T.....G.....CC--.....CA.....GT..T..C..T.A.....A.A...                         |        |
| Dog        | ..CA.T..C..G.....C..C--.....CA.....T..T.....T.AA.....                              |        |
| Opossum    | G...CACTA.C.....CT..T.G.AAA..ACC.C..CAC..A..CA...T..T.....TT.C..C.T.....C          |        |

>chr6:143946564-143946639 (Sox5) [76bp]

|            |                                                                             |  |        |
|------------|-----------------------------------------------------------------------------|--|--------|
|            | GLI                                                                         |  | SOX9   |
|            | <<<<<<                                                                      |  | <<<<<< |
| Mouse      | TGGGTGGTACCTTTTACAATCACCTTAATGGTGGCTCGGTGACAGCGAAACAACCTTCAAGATCGCCTCATGAAT |  |        |
| Human      | .....C.....CT.....A.....T.....                                              |  |        |
| Chimpanzee | .....C.....CT.....A.....T.....                                              |  |        |
| Cow        | .....C.....CT.....A.....T.....                                              |  |        |
| Dog        | .....C.....CT.....A.....T.....                                              |  |        |
| Opossum    | .....C.....CT.....A.....TA.....G.....A.....T.....                           |  |        |

>chr6:144053027-144053054 (Sox5) [28bp]

|            |                               |  |        |
|------------|-------------------------------|--|--------|
|            | GLI                           |  | SOX9   |
|            | >>>>>>                        |  | <<<<<< |
| Mouse      | ACACCCACACGGAAGAGTCTGCATTGTG  |  |        |
| Human      | .....T.....C.....             |  |        |
| Chimpanzee | .....T.....C.....             |  |        |
| Cow        | .....TT.....C.....            |  |        |
| Dog        | .....T.....C.....             |  |        |
| Opossum    | .....T.....T.....C.....T..... |  |        |

>chr6:144261597-144261674 (Sox5) [78bp]

|            |                                                                              |  |        |
|------------|------------------------------------------------------------------------------|--|--------|
|            | SOX9                                                                         |  | GLI    |
|            | <<<<<<                                                                       |  | >>>>>> |
| Mouse      | ATTGTGACTTCAGACAGTGCCTTCAAGGGTCTCTACTGTACCGAATTGAGGTCAGTCAAGACAATGCCAACACCCA |  |        |
| Human      | .....T.....                                                                  |  |        |
| Chimpanzee | .....T.....                                                                  |  |        |
| Cow        | .....T.....                                                                  |  |        |
| Dog        | .....T.....                                                                  |  |        |
| Opossum    | .....T.....T.....                                                            |  |        |

>chr7:122950543-122950584 (Sox6) [42bp]

|            |                                         |  |        |
|------------|-----------------------------------------|--|--------|
|            | SOX9                                    |  | GLI    |
|            | >>>>>>                                  |  | >>>>>> |
| Mouse      | CACAATGCCAGGAACCTC-ACAAAGGATTCAGTCCACCA |  |        |
| Human      | .....A.....TCT-.....CA.....             |  |        |
| Chimpanzee | .....A.....TCT-.....CA.....             |  |        |
| Cow        | .....A.....A.....CT-.....A.....G.....   |  |        |
| Dog        | .....A.TT.....CT-.....G.....            |  |        |
| Opossum    | ..A.....                                |  |        |

>chr7:122889339-122889361 (Sox6) [23bp]

|            |                         |  |        |
|------------|-------------------------|--|--------|
|            | GLI                     |  | SOX9   |
|            | >>>>>>                  |  | >>>>>> |
| Mouse      | ACACCCAGGCACTGCTGCACAAT |  |        |
| Human      | .....                   |  |        |
| Chimpanzee | .....                   |  |        |
| Cow        | .....                   |  |        |
| Dog        | .....                   |  |        |
| Opossum    | .....G.....             |  |        |

>chr7:122768535-122768622 (Sox6) [88bp]

|            |                                                                                     |  |        |
|------------|-------------------------------------------------------------------------------------|--|--------|
|            | GLI                                                                                 |  | SOX9   |
|            | >>>>>>                                                                              |  | >>>>>> |
|            |                                                                                     |  | SOX9   |
|            |                                                                                     |  | <<<<<< |
| Mouse      | ACACCAATGACGGGCAAGAATAATGATGAAAAACAAGAGATCTATGTCTATGAAACCGTGTGGACAAAAT-GGGCCATTGTTG |  |        |
| Human      | .....T.....A.....                                                                   |  |        |
| Chimpanzee | .....T.....A.....                                                                   |  |        |
| Cow        | .....T.....A.....                                                                   |  |        |
| Dog        | .....T.....A.....                                                                   |  |        |
| Opossum    | .....G.....T.....A.....TA.....G.....                                                |  |        |

>chr7:122768535-122768618 (Sox6) [84bp]

|            |                                                                                  |  |        |
|------------|----------------------------------------------------------------------------------|--|--------|
|            | GLI                                                                              |  | SOX9   |
|            | >>>>>>                                                                           |  | >>>>>> |
| Mouse      | ACACCAATGACGGGCAAGAATAATGATGAAAAACAAGAGATCTATGTCTATGAAACCGTGTGGACAAAAT-GGGCCATTG |  |        |
| Human      | .....T.....A.....                                                                |  |        |
| Chimpanzee | .....T.....A.....                                                                |  |        |
| Cow        | .....T.....A.....                                                                |  |        |
| Dog        | .....T.....A.....                                                                |  |        |
| Opossum    | .....G.....T.....A.....TA.....G.....                                             |  |        |

>chr7:122688703-122688746 (Sox6) [44bp]

|            |                                               |  |        |
|------------|-----------------------------------------------|--|--------|
|            | GLI                                           |  | SOX9   |
|            | <<<<<<                                        |  | >>>>>> |
| Mouse      | TGGGTGTGGGTGCTC-TTGTGGTTTATATTCTGGTCTCTATTGAT |  |        |
| Human      | .....CA...T.CA...C.....                       |  |        |
| Chimpanzee | .....CA...T.CA...C.....T.....                 |  |        |
| Cow        | .....C.....CA...T.CA...C.....                 |  |        |
| Dog        | .....ACA...C.CA...C.....                      |  |        |
| Opossum    | .....T.CA...T.CA...C...CG.....C...CCC...      |  |        |

>chr7:122512112-122512133 (Sox6) [22bp]

|            |                       |  |        |
|------------|-----------------------|--|--------|
|            | SOX9                  |  | GLI    |
|            | <<<<<<                |  | <<<<<< |
| Mouse      | ATTGTGTGTGCTGAGTGGGTG |  |        |
| Human      | .....                 |  |        |
| Chimpanzee | .....                 |  |        |
| Cow        | .....CT.....          |  |        |
| Dog        | .....                 |  |        |
| Opossum    | .....T.....T.....     |  |        |

>chr7:122445981-122446046 (Sox6) [66bp]

|            |                                                                |  |        |
|------------|----------------------------------------------------------------|--|--------|
|            | SOX9                                                           |  | GLI    |
|            | >>>>>>                                                         |  | >>>>>> |
| Mouse      | ATTGATGAAAGGCGGCTTGTTCGATAAATAAATAAAGATGCAAACTAAAGTTTAAACACCCA |  |        |
| Human      | .....                                                          |  |        |
| Chimpanzee | .....                                                          |  |        |
| Cow        | .....A.....C.....                                              |  |        |
| Dog        | .....ACA...C.CA...C.....                                       |  |        |
| Opossum    | .....G...C.A...CA...C.....AG...G.C.....                        |  |        |

>chr7:122377719-122377830 (Sox6) [112bp]

|            |                                                                                                             |  |        |  |        |
|------------|-------------------------------------------------------------------------------------------------------------|--|--------|--|--------|
|            | GLI                                                                                                         |  | TCF    |  | SOX9   |
|            | <<<<<<                                                                                                      |  | >>>>>> |  | >>>>>> |
| Mouse      | TGGGTGGAAAGGCCAGACAATGGAGCGCTATTTGTGTTGCAACAAGGCCCTCAAGAAAGATTTGATAGTATGGGATGGCCGGTAGGCCGTACAAGAATCTGCACAAT |  |        |  |        |
| Human      | .....T.....T.....C.....G.C.T.....GCA.....T.....A.....A.CG..G..TG-.A.....                                    |  |        |  |        |
| Chimpanzee | .....T.....T.....C.....G.C.T.....GCA.....T.....A.....A.CG..G..TG-.A.....                                    |  |        |  |        |
| Cow        | .....T.....T.....C.....G.C.T.....GC.....G.....G..G..TG-.A.....                                              |  |        |  |        |
| Dog        | .....G.....T.....G.C.C.....GC.....GG.....G.....AG.....G.G..TG-.A.....                                       |  |        |  |        |
| Opossum    | .....T...C.....C.....ATCT.A.....C...GCA..G...A.G.C.T.A.G...T...G.A...A.AACACACA.CATGCCTG-.CAT.....          |  |        |  |        |
